# Supplementary material for: Biostimulant red seaweed (Gracilaria tenuistipitata var. liui) extracts spray improves yield and drought tolerance in soybean
Source: PeerJ. 2023 Jun 23;11:e15588. doi: 10.7717/peerj.15588 (PMC10292196; doi:10.7717/peerj.15588)
Supplement: Supplemental Information 1 [file peerj-11-15588-s001.xlsx]

## Sheet: Sheet1
	Raw data for Figures 1 and 2
	Figure 1
		Relative Water content
	Treatment	R1	R2	R3	Mean
	CS0	69.06	71.1	70.71	70.29
	CS1	72.28	73.84	74.9	73.67
	CS2	75.54	73.66	75	74.73
	DS0	60.97	57.39	58.76	59.04
	DS1	62.16	63.11	64.51	63.26
	DS2	65.1	66.04	67.9	66.35
	C=well water, D= Drought, S0=0% seaweed extract, S1=5% seaweed extract, S2=10% seaweed extract
	Figure 2
		Water Saturation deficit
	Treatment	R1	R2	R3	Mean
	CS0	30.94	28.9	29.29	29.71
	CS1	27.72	26.16	25.1	26.33
	CS2	24.46	26.34	25	25.27
	DS0	39.03	42.61	41.24	40.96
	DS1	37.84	36.89	35.49	36.74
	DS2	34.9	33.96	32.1	33.65
	C=well water, D= Drought, S0=0% seaweed extract, S1=5% seaweed extract, S2=10% seaweed extract
