# Supplementary material for: Biostimulant red seaweed (Gracilaria tenuistipitata var. liui) extracts spray improves yield and drought tolerance in soybean
Source: PeerJ. 2023 Jun 23;11:e15588. doi: 10.7717/peerj.15588 (PMC10292196; doi:10.7717/peerj.15588)
Supplement: Supplemental Information 2 [file peerj-11-15588-s002.xlsx]

## Sheet: Sheet1
Raw data for Tables 1, 2, 3, 4, and 5
Table 1
	R1	R2	R3	Mean
Crude protein (%)	24.45	24.46	24.47	24.46
Crude fiber (%)	5.1	4.9	5.15	5.05
Crude lipid (%)	0.17	0.13	0.15	0.15
Carbohydrates (%)	48.27	48.57	48.46	48.43
Ash (%)	10.25	10.35	10.07	10.22
Moisture (%)	11.76	11.59	11.7	11.68
Phosphorus (mg/100 g dry weight)	580.3	587.19	574.46	580.65
Calcium (mg/100 g dry weight)	129.68	131.82	130.43	130.64
Magnesium (mg/100 g dry weight)	3.65	3.23	3.31	3.4
Iron (mg/100 g dry weight)	76.71	76.75	76.27	76.58
Copper (mg/100 g dry weight)	4.33	3.82	3.53	3.89
Pb (mg/kg dry weight)	0.045	0.046	0.033	0.041
β-carotene (mg/100 g)	9.69	10.92	10.02	10.21
Vitamin C (mg/100 g)	3.06	2.82	2.28	2.72
Total energy (kcal/100 g)	299.76	300.63	300.4	300.3
Table 2.
Plant height
Treatment	R1	R2	R3	Mean
CS0	28.5	29.8	27.8	28.7
CS1	31.3	30.7	32.5	31.5
CS2	33.8	33	34.6	33.8
DS0	22.3	24.7	23.5	23.5
DS1	26.5	26.9	27.5	26.97
DS2	30.6	31.8	32.6	31.67
C=well water, D= Drought, S0=0% seaweed extract, S1=5% seaweed extract, S2=10% seaweed extract
Leaf fresh weight
Treatment	R1	R2	R3	Mean
CS0	11.01	11.2	11.1	11.1
CS1	11.35	11.2	11.3	11.28
CS2	12.8	11.33	11.4	11.84
DS0	6.15	6.5	6.6	6.42
DS1	7.29	7.83	7.5	7.54
DS2	7.91	8.21	7.8	7.97
C=well water, D= Drought, S0=0% seaweed extract, S1=5% seaweed extract, S2=10% seaweed extract
Table 3
Petiole fresh weight
Treatment	R1	R2	R3	Mean
CS0	2.43	2.53	2.7	2.55
CS1	2.26	2.73	2.97	2.65
CS2	2.78	2.98	2.8	2.85
DS0	1.23	1.1	1.15	1.16
DS1	1.5	1.72	1.65	1.62
DS2	1.6	1.75	1.81	1.72
C=well water, D= Drought, S0=0% seaweed extract, S1=5% seaweed extract, S2=10% seaweed extract
Stem fresh weight
Treatment	R1	R2	R3	Mean
CS0	5.39	5.2	5.33	5.31
CS1	5.49	5.42	5.82	5.58
CS2	5.89	5.82	5.7	5.8
DS0	2.91	2.02	2.33	2.42
DS1	3.92	3.6	3.38	3.63
DS2	4	3.87	3.91	3.93
C=well water, D= Drought, S0=0% seaweed extract, S1=5% seaweed extract, S2=10% seaweed extract
Total fresh weight
Treatment	R1	R2	R3	Mean
CS0	18.83	18.93	19.13	18.96
CS1	19.1	19.35	20.09	19.51
CS2	21.47	20.13	19.9	20.5
DS0	10.29	9.62	10.08	10
DS1	12.71	13.15	12.53	12.8
DS2	13.51	13.83	13.52	13.62
C=well water, D= Drought, S0=0% seaweed extract, S1=5% seaweed extract, S2=10% seaweed extract
Table 4. Chlorophyll a
Treatment	R1	R2	R3	Mean
CS0	1.42	1.45	1.4	1.42
CS1	1.52	1.48	1.54	1.51
CS2	1.6	1.65	1.55	1.6
DS0	1.19	1.22	1.23	1.21
DS1	1.45	1.5	1.48	1.47
DS2	1.54	1.6	1.57	1.57
C=well water, D= Drought, S0=0% seaweed extract, S1=5% seaweed extract, S2=10% seaweed extract
Chlorophyll b
Treatment	R1	R2	R3	Mean
CS0	1.1	1.05	1.09	1.08
CS1	1.2	1.15	1.17	1.17
CS2	1.3	1.34	1.27	1.3
DS0	1	0.9	0.8	0.9
DS1	1.24	1.17	1.2	1.2
C=well water, D= Drought, S0=0% seaweed extract, S1=5% seaweed extract, S2=10% seaweed extract
Total chlorophyll
Treatment	R1	R2	R3	Mean
CS0	2.52	2.5	2.49	2.5
CS1	2.72	2.63	2.71	2.68
CS2	2.9	2.99	2.82	2.9
DS0	2.19	2.12	2.03	2.11
DS1	2.69	2.67	2.68	2.68
DS2	2.78	2.89	2.84	2.84
C=well water, D= Drought, S0=0% seaweed extract, S1=5% seaweed extract, S2=10% seaweed extract
Table 5
	Number of Pod/ plant
Treatment	R1	R2	R3	Mean
CS0	52.4	51.67	52	52.02
CS1	53.55	52.89	54.1	53.51
CS2	56	57.33	55.98	56.44
DS0	36.33	37.67	38.33	37.44
DS1	45.44	46.33	48.33	46.7
DS2	49.67	48.98	47.63	48.76
C=well water, D= Drought, S0=0% seaweed extract, S1=5% seaweed extract, S2=10% seaweed extract
	No. of seed /pod
Treatment	R1	R2	R3	Mean
CS0	1.88	1.92	1.99	1.93
CS1	1.99	2.01	2.2	2.07
CS2	2.14	2.1	2.15	2.13
DS0	1.72	1.67	1.59	1.66
DS1	1.79	1.85	1.69	1.78
DS2	1.89	1.95	1.79	1.88
C=well water, D= Drought, S0=0% seaweed extract, S1=5% seaweed extract, S2=10% seaweed extract
	100 seed weight (g)/plant
Treatment	R1	R2	R3	Mean
CS0	10.1	10.34	10.46	10.3
CS1	11.19	11	11.54	11.24
CS2	11.5	11.67	11.74	11.64
DS0	7.67	7.88	7.91	7.82
DS1	8.28	8.76	8.6	8.55
DS2	9.87	9.32	9.6	9.6
C=well water, D= Drought, S0=0% seaweed extract, S1=5% seaweed extract, S2=10% seaweed extract
	Yield (g)/plant
Treatment	R1	R2	R3	Mean
CS0	10	10.26	10.3	10.19
CS1	12	11.98	11.69	11.89
CS2	12.5	12.67	12.7	12.62
DS0	5.89	5.66	5.09	5.55
DS1	6.98	6.67	6.5	6.72
DS2	8.81	8.6	8.34	8.58
C=well water, D= Drought, S0=0% seaweed extract, S1=5% seaweed extract, S2=10% seaweed extract
